# Supplementary material for: Comprehensive Mapping and Classification of Germany’s Drinking Water Protection Areas
Source: Research Square preprint supplement (doi:10.21203/rs.3.rs-7084780/v1), 2025-07-18
Supplement: Supplementary file 1 [file 30223d8d7959b3e88637da78.docx]

**Supporting Information:**

**Table S1:** WPA dataset with data sources [34]

| **Attribute** | **Data type** | **Units** | **Definition** | **Source** |
| --- | --- | --- | --- | --- |
| AREA | numerical | ha | WPA area in ha | [-] |
| ADM_Lev | categorical | [-] | Administrative areas on federal state level derived from dataset **VG250** (for administrative codes see Table 3) | Bundesamt für Kartographie und Geodäsie (2024a): Digitale Geodaten. Verwaltungsgebiete 1:2 500 000, Stand 31.12. (VG2500 31.12.). Available online at https://gdz.bkg.bund.de/index.php/default/digitale-geodaten/verwaltungsgebiete/verwaltungsgebiete-1-2-500-000-stand-31-12-vg2500-12-31.html, checked on 2/29/2024. |
| Rock | categorical | [-] | ‘L’ for loose rock and ‘S’ for solid rock derived from HUEK250 | BGR (2019a): Hydrogeologische Übersichtskarte 1:250.000 von Deutschland (HÜK250). Available online at https://geoportal.bgr.de/mapapps/resources/apps/geoportal/index.html?lang=de#/datasets/portal/61ac4628-6b62-48c6-89b8-46270819f0d6, checked on 1/18/2024. |
| Poros | categorical | [-] | ‘P’ for porous, ‘F’ for fissure, ‘F/Ka’ for fissure/karst, ‘F/P’ for fissure/porous derived from HUEK250 | BGR (2019a) |
| DEEP_GW | categorical | [-] | Indicates whether there is a deep groundwater body according to the WFD 2022 with ‘1’ yes and ‘0’ no | Geoportal der BfG (2024a): Water body for WFD (Wasserkörper-DE). Available online at https://geoportal.bafg.de/inspire/download/AM/waterBodyForWFD/datasetfeed.xml, checked on 3/22/2024. |
| Resp_time | numerical | months | The drought response time (Tmax in the original source) describes the time until a precipitation anomaly is recognizable at the groundwater table | Hellwig, J., De Graaf, I. E. M., Weiler, M., & Stahl, K. (2020): Large‐scale assessment of delayed groundwater responses to drought. *Water Resources Research*, *56*(2), e2019WR025441. DOI: [10.1029/2019WR025441](https://doi.org/10.1029/2019WR025441) |
| Precip | numerical | mm/yr | Mean precipitation derived from model NatUrWB | Schmit, Max; Steinbrich, Andreas; Leistert, Hannes; Weiler, Markus (2022): Webtool zur Ermittlung der naturnahen urbanen Wasserbilanz (NatUrWB). In *KW - Korrespondenz Wasserwirtschaft* 15 (9), pp. 530–536. DOI: 10.3243/kwe2022.09.002. |
| Perc | numerical | mm/yr | Mean percolation derived from model NatUrWB | Schmit, Max; Steinbrich, Andreas; Leistert, Hannes; Weiler, Markus (2022): Webtool zur Ermittlung der naturnahen urbanen Wasserbilanz (NatUrWB). In *KW - Korrespondenz Wasserwirtschaft* 15 (9), pp. 530–536. DOI: 10.3243/kwe2022.09.002. |
| LULC | categorical | [-] | Land use category: ‘1’ for artificial surfaces, ‘2’ for agricultural areas and ‘3’ for Forest and semi-natural areas derived from CORINE landcover 2018 | Bundesamt für Kartographie und Geodäsie (2024b): Open Data. CORINE Land Cover 5 ha, Stand 2018 (CLC5-2018). Available online at https://gdz.bkg.bund.de/index.php/default/open-data/corine-land-cover-5-ha-stand-2018-clc5-2018.html, checked on 1/24/2024. |
| LULC_1 | numerical | % | Area share of land use category ‘artificial surfaces’ in a WPA (%) derived from CORINE landcover 2018 | Bundesamt für Kartographie und Geodäsie (2024b) |
| LULC_2 | numerical | % | Area share of land use category ‘agricultural areas’ in a WPA (%) derived from CORINE landcover 2018 | Bundesamt für Kartographie und Geodäsie (2024b) |
| LULC_3 | numerical | % | Area share of land use category ‘forest and semi-natural areas’ in a WPA (%) derived from CORINE landcover 2018 | Bundesamt für Kartographie und Geodäsie (2024b) |
| ANTO | numerical | LSU | Total livestock units in the year 2020 | Gocht, Alexander; Röder, Norbert (2014): Using a Bayesian estimator to combine information from a cluster analysis and remote sensing data to estimate high-resolution data for agricultural production in Germany. In *International Journal of Geographical Information Science* 28 (9), pp. 1744–1764. DOI: 10.1080/13658816.2014.897348.  Thünen Agraratlas (2022): Landwirtschaftliche Nutzung Version 2022. Daten: Stat. Ämter der Länder, Kreisdaten der Landwirtschaftszählung 2020 (eigene Berechnungen); FDZ der Stat. Ämter des Bundes und der Länder, Landwirtschaftszählung 2010/2020 (10.21242/41121.2010.00.00.1.1.0; 10.21242/41141.2020.00.00.1.1.0) und AFiD-Panel Agrarstruktur 199, 2003, 2007, 2016 (10.21242/41121.2007.00.01.1.1.0; 10.21242/41121.2020.00.01.1.1.0) (eigene Berechnung: Kreisdaten 1999-2020. Clusterschätzer); GeoBasis-DE/BKG (2020). |
| Irrig | categorical | [-] | Share of irrigated area in the agricultural used area in the year 2020, (category assignment see Table 7) | Statistische Ämter des Bundes und der Länder (2024): Atlas Agrarstatistik Deutschland. Anteil der bewässerten Fläche 2020. Available online at https://agraratlas.statistikportal.de, checked on 2/20/2024. |
| Farms | numerical | [-] | Number of farms in the WPA area in the year 2020 | Regionaldatenbank Deutschland (2024a): Agrarstrukturerhebung / Landwirtschaftszählung. Code 41141-07-01-4. Available online at https://www.regionalstatistik.de/genesis/online, checked on 6/6/2024. |
| Dom_crop | categorical | [-] | Dominant crop type in WPA between 2020-2022 | Schwieder, Marcel; Tetteh, Gideon Okpoti; Blickensdörfer, Lukas; Gocht, Alexander; Erasmi, Stefan (2024a): Agricultural land use (raster) : National-scale crop type maps for Germany from combined time series of Sentinel-1, Sentinel-2 and Landsat data (2017 to 2021). DOI: 10.5281/zenodo.10640528.  Schwieder, Marcel; Tetteh, Gideon Okpoti; Blickensdörfer, Lukas; Gocht, Alexander; Erasmi, Stefan (2024b): Agricultural land use (raster) : National-scale crop type maps for Germany from combined time series of Sentinel-1, Sentinel-2 and Landsat data (2022). DOI: 10.5281/zenodo.10628809. |
| Elev_min | numerical | m.asl | Minimum elevation in the WPA derived from EU-DEM | Eurostat (2024): GISCO. Copernicus Digital elevation model. Available online at https://ec.europa.eu/eurostat/web/gisco/geodata/digital-elevation-model/copernicus#Elevation, checked on 2/29/2024. |
| Elev_max | numerical | m.asl | Maximum elevation in the WPA derived from EU-DEM | Eurostat (2024) |
| Elev_mean | numerical | m.asl | Mean elevation the WPA derived from EU-DEM | Eurostat (2024) |
| Elev_range | numerical | m.asl | Elevation range in the WPA derived from EU-DEM | Eurostat (2024) |
| WFD_Chem | categorical | [-] | Chemical status of corresponding groundwater body according to WFD 2022 with ‘0’ good status and ‘1’ bad status | Geoportal der BfG (2024a): Water body for WFD (Wasserkörper-DE). Available online at https://geoportal.bafg.de/inspire/download/AM/waterBodyForWFD/datasetfeed.xml, checked on 3/22/2024. |
| WFD_Chem_Perc | numerical | % | Area share of corresponding groundwater bodies in a bad chemical status (%) according to the WFD 2022 | Geoportal der BfG (2024a) |
| WFD_Quant | categorical | [-] | Quantitative status of corresponding groundwater body according to the WFD 2022 with ‘0’ good status and ‘1’ bad status | Geoportal der BfG (2024a) |
| WFD_Quant_Perc | numerical | % | Area share of corresponding groundwater bodies in a bad quantitative status (%) according to the WFD 2022 | Geoportal der BfG (2024a) |
| Pop_dens | numerical | inhabitants/ km² | Population density in the year 2022 | Regionalatlas Deutschland (2024): Bevölkerungsstand - Geburten - Gestorbene - Wanderungen. Bevölkerungsdichte (EW je qkm). Available online at https://regionalatlas.statistikportal.de, checked on 2/16/2024. |
| Pop | numerical | [-] | Number of inhabitants in the year 2019 | Regionaldatenbank Deutschland (2024c): Erhebung der öffentlichen Wasserversorgung. Code 32211-02-02-4. Available online at https://www.regionalstatistik.de/genesis/online, checked on 4/2/2024. |
| Pop_wat | numerical | [-] | Number of inhabitants with connection to the public water supply in the year 2019 | Regionaldatenbank Deutschland (2024c) |
| W_extrac | numerical | 1000 m³/yr | Total water extraction in the year 2019 | Regionaldatenbank Deutschland (2024b): Erhebung der öffentlichen Wasserversorgung. Code 32211-01-02-4. Available online at https://www.regionalstatistik.de/genesis/online, checked on 2/29/2024. |
| GW_extrac | numerical | 1000 m³/yr | Water extraction from groundwater and springs in the year 2019 | Regionaldatenbank Deutschland (2024b) |
| W_consum | numerical | 1000 m³/yr | Water supplied to end consumer in the year 2019 | Regionaldatenbank Deutschland (2024c) |
| W_consum_day | numerical | L/person/day | Water consumption per inhabitant per day (in liters) in the year 2019 | Regionaldatenbank Deutschland (2024c) |
| W_cost_m3 | numerical | €/m³ | Consumption based water costs in the year 2022 | Regionaldatenbank Deutschland (2024d): Erhebung der Wasser- und Abwasserentgelte. Code 32271-01-01-4. Available online at https://www.regionalstatistik.de/genesis/online, checked on 4/3/2024. |
| Tourism_st | numerical | [-] | Tourism overnight stays in the year 2022 | Regionaldatenbank Deutschland (2024e): Monatserhebung im Tourismus. Code 45412-03-02-4. Available online at https://www.regionalstatistik.de/genesis/online, checked on 6/6/2024. |

**Table S2:** Overall average silhouette widths for clustering algorithm PAM, number of clusters k ranging from 2-12

| **k** | **Average silhouette width** |
| --- | --- |
| 12 | 0.50 |
| 11 | 0.51 |
| 10 | 0.48 |
| 9 | 0.47 |
| 8 | 0.46 |
| 7 | 0.43 |
| 6 | 0.43 |
| 5 | 0.41 |
| 4 | 0.40 |
| 3 | 0.46 |
| 2 | 0.47 |
